# Supplementary material
Source: MDPI journal article supplement (https://www.mdpi.com/2073-4433/12/12/1677)
Supplement: s1 [file s1]

# Supplementary materials: Size-Segregated Elemental Profile and Associated Health Risk Assessment of Road Dust along Major Traffic Corridors in Kolkata Mega City

Deepanjan Majumdar <sup>1\*</sup>, Bratisha Biswas <sup>2</sup>, Dipanjali Majumdar <sup>1</sup> and Rupam Ray <sup>2</sup>

<sup>1</sup> Kolkata Zonal Centre, CSIR-National Environmental Engineering Research Institute, i-8, Sector C, EKDP, EM Bypass, Kolkata 700107, India; ds\_majumdar@neeri.res.in

<sup>2</sup> Asutosh College, University of Calcutta, 92 Shyamaprasad Mukherjee Road, Kolkata 700026, India; bratishabiswas@gmail.com (B.B.); rupamray14nov@gmail.com (R.R.)

\* Correspondence: d\_majumdar@neeri.res.in; Tel.: +91-33-24415999; Fax: +91-33-24417608

**Table S1.** Summary of non-cumulative particle size distribution of road dust (<106 µm particle size range)\*.

| Size range (µ) | Alipore | Rabindra Sadan | Hazra | Esplanade | Shyambazar | Ruby Square | Jadavpur | Picnic Garden | College Street | Khidirpur | Ultadanga |
|----------------|---------|----------------|-------|-----------|------------|-------------|----------|---------------|----------------|-----------|-----------|
| <4.5           | 5.69    | 5.13           | 6.19  | 5.69      | 4.53       | 5.95        | 4.80     | 10.42         | 8.73           | 6.87      | 5.09      |
| 4.5–5.5        | 1.14    | 1.08           | 1.4   | 1.40      | 0.93       | 1.22        | 0.96     | 2.32          | 1.79           | 1.57      | 1.26      |
| 5.5–6.5        | 1.06    | 1.02           | 1.35  | 1.39      | 0.86       | 1.14        | 0.88     | 2.19          | 1.61           | 1.51      | 1.24      |
| 6.5–7.5        | 0.98    | 0.96           | 1.29  | 1.36      | 0.83       | 1.07        | 0.85     | 2.05          | 1.47           | 1.45      | 1.23      |
| 7.5–9          | 1.34    | 1.35           | 1.84  | 2.00      | 1.17       | 1.50        | 1.22     | 2.88          | 1.99           | 2.05      | 1.81      |
| 9–11           | 1.62    | 1.65           | 2.27  | 2.51      | 1.48       | 1.82        | 1.65     | 3.55          | 2.43           | 2.51      | 2.31      |
| 11–13          | 1.52    | 1.52           | 2.10  | 2.35      | 1.41       | 1.68        | 1.72     | 3.29          | 2.29           | 2.3       | 2.21      |
| 13–15.5        | 1.82    | 1.82           | 2.44  | 2.69      | 1.73       | 2.00        | 2.31     | 3.85          | 2.85           | 2.65      | 2.65      |
| 15.5–18.5      | 2.23    | 2.16           | 2.76  | 2.99      | 2.05       | 2.34        | 2.98     | 4.35          | 3.59           | 3.02      | 3.08      |
| 18.5–21.5      | 2.40    | 2.32           | 2.71  | 2.87      | 2.10       | 2.45        | 3.15     | 4.16          | 3.91           | 3.05      | 3.12      |
| 21.5–25        | 3.18    | 3.09           | 3.30  | 3.47      | 2.58       | 3.19        | 3.78     | 4.73          | 4.99           | 3.88      | 3.88      |
| 25–30          | 5.40    | 5.48           | 5.32  | 5.65      | 4.18       | 5.49        | 5.50     | 6.66          | 7.76           | 6.53      | 6.36      |
| 30–37.5        | 10.12   | 10.76          | 9.71  | 10.50     | 7.96       | 10.61       | 8.59     | 9.95          | 12.25          | 12.04     | 11.54     |
| 37.5–45        | 11.83   | 12.81          | 11.32 | 11.95     | 10.64      | 12.37       | 9.69     | 9.69          | 11.77          | 13.21     | 12.91     |
| 45–52.5        | 12.18   | 13.07          | 11.63 | 11.96     | 12.32      | 12.55       | 10.78    | 8.84          | 10.18          | 12.63     | 12.68     |
| 52.5–62.5      | 14.78   | 15.44          | 13.97 | 13.88     | 16.51      | 14.84       | 14.51    | 9.38          | 10.13          | 12.6      | 13.92     |
| 62.5–75        | 12.87   | 12.48          | 11.72 | 10.89     | 16.01      | 11.88       | 14.67    | 7.10          | 7.27           | 8.35      | 9.76      |
| 75–90          | 7.05    | 6.13           | 6.04  | 5.14      | 8.87       | 5.65        | 8.96     | 3.54          | 3.55           | 2.82      | 3.82      |
| 90–106         | 2.17    | 1.73           | 1.85  | 1.31      | 2.72       | 1.61        | 3.00     | 1.05          | 1.08           | 0.46      | 8.50      |

\* Higher degree of uncertainty is expected in finer particle ranges as compared to coarse ranges due to possible loss of fine particles during sampling

**Table S2.** Volumetric mean diameter (VMD), Sauter Mean Diameter (SMD), surface area to volume ratio ( $S_v$ ) and specific surface ( $S_m$ ) area of road dust (<106  $\mu\text{m}$  road dust).

| Site           | SMD   | VMD   | $S_v$ ( $\text{m}^2 \text{cm}^{-3}$ ) | $S_m$ ( $\text{cm}^2 \text{g}^{-1}$ ) |
|----------------|-------|-------|---------------------------------------|---------------------------------------|
| Alipore        | 18.59 | 44.35 | 0.32                                  | 1190.73                               |
| Rabindra Sadan | 19.33 | 43.58 | 0.31                                  | 1145.13                               |
| Hazra          | 16.93 | 42.02 | 0.35                                  | 1307.95                               |
| Esplanade      | 17.08 | 40.20 | 0.35                                  | 1296.32                               |
| Shyambazar     | 21.32 | 48.28 | 0.28                                  | 1038.27                               |
| Ruby Square    | 17.86 | 42.76 | 0.34                                  | 1239.98                               |
| Jadavpur       | 19.96 | 45.51 | 0.30                                  | 1109.26                               |
| Picnic Garden  | 11.79 | 32.58 | 0.51                                  | 1877.33                               |
| College Street | 13.69 | 35.46 | 0.44                                  | 1617.04                               |
| Khidirpur      | 15.49 | 37.05 | 0.39                                  | 1429.71                               |
| Ultadanga      | 17.91 | 39.51 | 0.33                                  | 1236.14                               |

**Table S3** Metal concentration ( $\text{mg kg}^{-1}$ ) in size-segregated road dust at different sites in Kolkata

|                                          |                       | <i>Cd</i>    | <i>Cr</i>     | <i>Co</i>    | <i>Pb</i>    | <i>Mn</i>     | <i>Ni</i>    | <i>Sr</i>     | <i>Zn</i>     | <i>Fe</i>       | <i>Mg</i>       | <i>Li</i>     | <i>Ti</i>      | <i>Cu</i>    | <i>Ba</i>     |
|------------------------------------------|-----------------------|--------------|---------------|--------------|--------------|---------------|--------------|---------------|---------------|-----------------|-----------------|---------------|----------------|--------------|---------------|
| <b>Earth Crust Reference values [35]</b> |                       | <b>0.20</b>  | <b>100.00</b> | <b>25.00</b> | <b>12.50</b> | <b>950.00</b> | <b>75.00</b> | <b>375.00</b> | <b>70.00</b>  | <b>56300.00</b> | <b>23300.00</b> | <b>20.00</b>  | <b>5700.00</b> | <b>55.00</b> | <b>425.00</b> |
| <i>Shyambazar</i>                        | <28 $\mu\text{m}$     | 3.68         | 115.49        | 9.96         | 4.97         | 511.21        | 44.08        | 61.12         | 396.42        | 24503.62        | 10929.94        | 395.81        | 475.04         | 186.85       | 459.21        |
| <i>Khidirpur</i>                         |                       | 2.95         | 97.97         | 10.85        | 4.17         | 522.22        | 38.39        | 53.17         | 271.94        | 20556.71        | 6433.45         | 460.16        | 568.71         | 81.39        | 284.64        |
| <i>Ruby</i>                              |                       | 2.32         | 70.71         | 9.37         | 3.19         | 340.89        | 42.58        | 54.03         | 245.17        | 14551.34        | 8168.63         | 430.42        | 587.30         | 55.45        | 270.95        |
| <i>College St.</i>                       |                       | 2.85         | 85.96         | 10.36        | 3.48         | 378.26        | 57.35        | 61.91         | 288.62        | 15043.41        | 8361.94         | 441.72        | 425.64         | 61.72        | 350.91        |
| <i>Ultadanga</i>                         |                       | 2.59         | 86.82         | 10.21        | 3.90         | 369.95        | 57.80        | 58.92         | 293.26        | 17493.63        | 7195.18         | 444.23        | 423.07         | 64.38        | 441.36        |
| <i>R. Sadan</i>                          |                       | 2.68         | 71.27         | 9.11         | 3.53         | 402.19        | 38.85        | 66.32         | 297.16        | 14736.23        | 8102.92         | 433.91        | 475.50         | 55.66        | 305.29        |
| <i>Hazra</i>                             |                       | 2.48         | 67.35         | 11.01        | 3.32         | 389.26        | 44.87        | 56.06         | 289.00        | 16191.09        | 7893.53         | 460.01        | 355.44         | 72.39        | 324.79        |
| <i>Alipore</i>                           |                       | 2.16         | 65.53         | 9.30         | 3.07         | 407.09        | 53.20        | 61.19         | 266.41        | 15079.15        | 7662.83         | 441.07        | 476.77         | 57.36        | 451.28        |
|                                          | <b>Mean</b>           | <b>2.68</b>  | <b>71.27</b>  | <b>9.11</b>  | <b>3.53</b>  | <b>402.19</b> | <b>38.85</b> | <b>66.32</b>  | <b>297.16</b> | <b>14736.23</b> | <b>8102.92</b>  | <b>433.91</b> | <b>475.50</b>  | <b>55.66</b> | <b>305.29</b> |
|                                          | <b>SD</b>             | <b>0.47</b>  | <b>17.49</b>  | <b>0.72</b>  | <b>0.63</b>  | <b>66.02</b>  | <b>7.89</b>  | <b>4.45</b>   | <b>45.02</b>  | <b>3543.82</b>  | <b>1304.46</b>  | <b>20.32</b>  | <b>76.35</b>   | <b>44.34</b> | <b>78.11</b>  |
|                                          | <b>CV(%)</b>          | <b>17.62</b> | <b>24.54</b>  | <b>7.85</b>  | <b>17.74</b> | <b>16.42</b>  | <b>20.30</b> | <b>6.71</b>   | <b>15.15</b>  | <b>24.05</b>    | <b>16.10</b>    | <b>4.68</b>   | <b>16.06</b>   | <b>79.65</b> | <b>25.59</b>  |
| <i>Shyambazar</i>                        | >28–<45 $\mu\text{m}$ | 5.07         | 143.97        | 8.59         | 6.15         | 600.93        | 48.99        | 48.34         | 428.50        | 30531.94        | 10806.29        | 421.63        | 475.79         | 247.30       | 376.04        |
| <i>Khidirpur</i>                         |                       | 1.98         | 57.43         | 9.63         | 2.78         | 349.61        | 40.50        | 48.45         | 260.45        | 14960.27        | 7629.34         | 440.46        | 480.95         | 57.05        | 447.93        |

|               |            |       |        |       |       |        |       |       |        |          |          |        |        |        |        |
|---------------|------------|-------|--------|-------|-------|--------|-------|-------|--------|----------|----------|--------|--------|--------|--------|
| Ruby          |            | 2.63  | 66.03  | 9.31  | 3.24  | 330.76 | 46.30 | 54.18 | 262.03 | 13968.23 | 8182.39  | 462.41 | 404.30 | 50.60  | 275.47 |
| College St.   |            | 1.83  | 44.73  | 6.88  | 2.34  | 258.74 | 31.26 | 40.29 | 172.25 | 12013.79 | 7507.64  | 462.22 | 419.21 | 36.70  | 177.07 |
| Ultadanga     |            | 3.28  | 100.80 | 9.62  | 3.89  | 357.55 | 67.11 | 48.00 | 281.66 | 18353.41 | 6928.87  | 448.28 | 351.08 | 73.68  | 270.91 |
| R.Sadan       |            | 2.14  | 52.62  | 7.40  | 2.78  | 343.83 | 26.45 | 49.54 | 235.03 | 13935.24 | 7380.53  | 452.82 | 420.64 | 38.63  | 225.50 |
| Hazra         |            | 3.00  | 86.25  | 9.37  | 3.70  | 484.72 | 35.25 | 38.26 | 236.34 | 21135.34 | 6067.40  | 470.37 | 526.54 | 74.75  | 206.23 |
| Alipore       |            | 1.89  | 48.90  | 8.19  | 2.49  | 339.57 | 38.74 | 49.43 | 235.22 | 12847.99 | 7102.53  | 463.78 | 370.91 | 42.17  | 320.96 |
|               | Mean       | 2.14  | 52.62  | 7.40  | 2.78  | 343.83 | 26.45 | 49.54 | 235.03 | 13935.24 | 7380.53  | 452.82 | 420.64 | 38.63  | 225.50 |
|               | SD         | 1.09  | 33.88  | 1.05  | 1.23  | 107.70 | 12.61 | 5.21  | 73.91  | 6170.33  | 1396.06  | 15.83  | 59.27  | 70.12  | 90.84  |
|               | CV(%)      | 50.88 | 64.39  | 14.20 | 44.42 | 31.32  | 47.68 | 10.52 | 31.45  | 44.28    | 18.92    | 3.50   | 14.09  | 181.50 | 40.28  |
| Shyambazar    | 45–<63 µm  | 3.54  | 115.74 | 8.37  | 4.84  | 489.85 | 32.33 | 35.18 | 329.44 | 31239.96 | 10435.81 | 443.58 | 468.78 | 199.21 | 300.54 |
| Khidirpur     |            | 2.89  | 107.55 | 9.07  | 4.15  | 531.44 | 30.91 | 34.67 | 224.08 | 22887.42 | 5657.78  | 470.34 | 538.27 | 78.99  | 301.13 |
| Ruby          |            | 1.74  | 46.33  | 7.38  | 2.74  | 270.63 | 24.89 | 39.61 | 173.91 | 13060.48 | 7485.32  | 476.68 | 453.22 | 29.98  | 169.30 |
| College St.   |            | 2.99  | 60.02  | 9.87  | 3.73  | 331.42 | 47.77 | 51.48 | 270.46 | 13973.32 | 7963.55  | 473.27 | 427.68 | 49.03  | 457.04 |
| Ultadanga     |            | 2.39  | 122.36 | 9.16  | 2.86  | 309.40 | 63.79 | 38.22 | 238.77 | 16715.03 | 5932.63  | 465.40 | 355.02 | 54.24  | 204.12 |
| R.Sadan       |            | 2.23  | 55.99  | 7.64  | 2.93  | 339.75 | 24.82 | 48.70 | 237.82 | 13774.71 | 6981.17  | 446.99 | 375.98 | 34.48  | 204.77 |
| Hazra         |            | 2.24  | 58.05  | 9.59  | 2.91  | 343.22 | 40.39 | 43.62 | 260.43 | 15111.55 | 7572.23  | 468.99 | 375.60 | 63.00  | 341.24 |
| Alipore       |            | 1.88  | 47.50  | 8.36  | 2.66  | 330.60 | 27.85 | 45.95 | 218.47 | 13592.80 | 6787.39  | 457.29 | 405.02 | 42.22  | 285.02 |
| Picnic garden |            | 1.52  | 32.60  | 5.25  | 1.96  | 217.05 | 19.72 | 33.73 | 96.23  | 10609.18 | 5278.75  | 481.20 | 254.55 | BDL    | 288.35 |
|               | Mean       | 2.24  | 58.05  | 9.59  | 2.91  | 343.22 | 40.39 | 43.62 | 260.43 | 15111.55 | 7572.23  | 468.99 | 375.60 | 63.00  | 341.24 |
|               | SD         | 0.65  | 33.76  | 1.42  | 0.88  | 99.34  | 13.85 | 6.49  | 64.95  | 6404.68  | 1545.65  | 13.01  | 80.23  | 54.95  | 86.33  |
|               | CV(%)      | 29.23 | 58.16  | 14.78 | 30.22 | 28.95  | 34.28 | 14.87 | 24.94  | 42.38    | 20.41    | 2.77   | 21.36  | 87.23  | 25.30  |
| Shyambazar    | 63–<106 µm | 2.93  | 65.04  | 5.39  | 3.66  | 360.00 | 41.39 | 32.87 | 230.82 | 21981.97 | 9599.56  | 464.65 | 238.53 | 125.09 | 215.02 |
| Khidirpur     |            | 1.84  | 48.11  | 6.83  | 2.32  | 265.29 | 29.38 | 33.73 | 194.20 | 13940.21 | 6056.22  | 487.44 | 245.71 | 53.42  | 200.00 |
| Ruby          |            | 1.86  | 31.67  | 5.67  | 2.29  | 219.72 | 47.38 | 32.88 | 139.38 | 11228.55 | 6264.96  | 481.23 | 250.97 | 25.92  | 121.58 |
| College St.   |            | 0.85  | 9.74   | 2.62  | 0.97  | 79.22  | 14.16 | 9.19  | 67.45  | 4015.22  | 2126.98  | 501.18 | 99.07  | BDL    | 67.48  |
| Ultadanga     |            | 1.52  | 33.26  | 3.79  | 1.60  | 135.46 | 13.24 | 25.84 | 84.82  | 8788.50  | 3078.98  | 496.07 | 92.51  | 2.89   | 120.33 |

|                      |              |              |              |              |              |               |              |               |              |                 |                |               |               |               |              |
|----------------------|--------------|--------------|--------------|--------------|--------------|---------------|--------------|---------------|--------------|-----------------|----------------|---------------|---------------|---------------|--------------|
| <i>R.Sadan</i>       |              | 2.59         | 43.79        | 6.47         | 2.98         | 275.71        | 25.94        | 36.47         | 207.48       | 12347.38        | 5950.22        | 471.60        | 272.22        | 23.39         | 180.65       |
| <i>Hazra</i>         |              | 1.45         | 30.21        | 3.47         | 1.74         | 237.62        | 15.37        | 11.89         | 94.82        | 10965.18        | 2749.98        | 502.46        | 188.52        | 11.08         | 66.87        |
| <i>Alipore</i>       |              | 1.91         | 36.82        | 5.99         | 3.06         | 296.89        | 28.49        | 43.57         | 171.89       | 12235.43        | 5716.08        | 480.85        | 259.70        | 35.30         | 208.05       |
| <i>Picnic garden</i> |              | 1.01         | 16.56        | 2.93         | 1.70         | 156.68        | 13.27        | 28.88         | 63.00        | 6898.51         | 3366.22        | 479.36        | 113.07        | BDL           | 96.14        |
| <i>Jadavpur</i>      |              | 0.83         | 8.10         | 2.44         | 1.26         | 84.92         | 32.47        | 10.99         | 22.11        | 4647.44         | 2167.06        | 506.88        | 114.31        | BDL           | 172.68       |
|                      | <b>Mean</b>  | <b>1.45</b>  | <b>30.21</b> | <b>3.47</b>  | <b>1.74</b>  | <b>237.62</b> | <b>15.37</b> | <b>11.89</b>  | <b>94.82</b> | <b>10965.18</b> | <b>2749.98</b> | <b>502.46</b> | <b>188.52</b> | <b>11.08</b>  | <b>66.87</b> |
|                      | <b>SD</b>    | <b>0.70</b>  | <b>17.71</b> | <b>1.68</b>  | <b>0.86</b>  | <b>93.94</b>  | <b>12.16</b> | <b>11.94</b>  | <b>71.02</b> | <b>5192.17</b>  | <b>2406.81</b> | <b>14.08</b>  | <b>74.65</b>  | <b>41.09</b>  | <b>57.35</b> |
|                      | <b>CV(%)</b> | <b>48.43</b> | <b>58.62</b> | <b>48.51</b> | <b>49.51</b> | <b>39.53</b>  | <b>79.12</b> | <b>100.43</b> | <b>74.90</b> | <b>47.35</b>    | <b>87.52</b>   | <b>2.80</b>   | <b>39.60</b>  | <b>370.88</b> | <b>85.77</b> |

**Table S4.** Slope of decline in metal concentration with increasing particle size in size-segregated road dust.

| <b>Metal</b> | <b>Slope of decreasing linear trend</b> | <b>Best fit linear equation</b>           |
|--------------|-----------------------------------------|-------------------------------------------|
| Pb           | -0.487                                  | $y = -0.487x + 4.3375$<br>$R^2 = 0.8678$  |
| Fe           | -2013.8                                 | $y = -2013.8x + 20526$<br>$R^2 = 0.6605$  |
| Cd           | -0.3447                                 | $y = -0.3447x + 3.2359$<br>$R^2 = 0.8237$ |
| Cr           | -15.422                                 | $y = -15.422x + 104.02$<br>$R^2 = 0.7796$ |
| Co           | -1.6708                                 | $y = -1.6708x + 12.053$<br>$R^2 = 0.8544$ |
| Mn           | -64.368                                 | $y = -64.368x + 501.16$<br>$R^2 = 0.8544$ |
| Zn           | -53.39x                                 | $y = -53.39x + 361.67$<br>$R^2 = 0.91$    |
| Ni           | -7.0202                                 | $y = -7.0202x + 54.999$<br>$R^2 = 0.9891$ |
| Sr           | -10.319                                 | $y = -10.319x + 69.304$<br>$R^2 = 0.9763$ |
| Ba           | -65.253                                 | $y = -65.253x + 432.37$<br>$R^2 = 0.8714$ |
| Mg           | -1073.7                                 | $y = -1073.7x + 9590.1$<br>$R^2 = 0.8328$ |
| Li           | 15.838                                  | $y = 15.838x + 421.2$<br>$R^2 = 0.9815$   |
| Ti           | -88.308                                 | $y = -88.308x + 595.29$<br>$R^2 = 0.7961$ |
| Cu           | -12.817                                 | $y = -12.817x + 98.413$<br>$R^2 = 0.8052$ |

**Table S5.** Enrichment factors of metals and degree of pollution in road dust with respect to size range.

|                                       | <b>Enrichment Factor (EF)</b> |                    |                             |                             |                             |                             |                                      |                                   |                             |                             |                       |                                             |                              |
|---------------------------------------|-------------------------------|--------------------|-----------------------------|-----------------------------|-----------------------------|-----------------------------|--------------------------------------|-----------------------------------|-----------------------------|-----------------------------|-----------------------|---------------------------------------------|------------------------------|
| <b>Size range/Degree of pollution</b> | <b>Cd</b>                     | <b>Cr</b>          | <b>Co</b>                   | <b>Pb</b>                   | <b>Mn</b>                   | <b>Ni</b>                   | <b>Sr</b>                            | <b>Zn</b>                         | <b>Fe</b>                   | <b>Mg</b>                   | <b>Li</b>             | <b>Cu</b>                                   | <b>Ba</b>                    |
| <b>&lt;28 µm</b>                      | 112–221                       | 7–14               | 4–7                         | 2.5–4.8                     | 3.5–6.6                     | 5.1–10.4                    | 1.4–2.4                              | 34–68                             | 2.5–5.2                     | 2.8–5.6                     | 208.9–368.8           | 9.8–40.8                                    | 6.2–14                       |
| <b>Degree of metal pollution</b>      | <i>Extremely High</i>         | <i>Significant</i> | <i>Moderate-Significant</i> | <i>Moderate</i>             | <i>Moderate-Significant</i> | <i>Significant</i>          | <i>Depletion to minimal-Moderate</i> | <i>Very high-Extremely high</i>   | <i>Moderate-Significant</i> | <i>Moderate-Significant</i> | <i>Extremely High</i> | <i>Significant-very high-extremely high</i> | <i>Significant</i>           |
| <b>&gt;28-&lt;45 µm</b>               | 117–304                       | 6–17               | 4–6                         | 2.6–5.9                     | 3.7–7.6                     | 4.8–14.5                    | 1.1–2.1                              | 33.5–73.3                         | 2.9–6.5                     | 2.8–5.6                     | 252.6–363.9           | 9.1–53.9                                    | 5.2–12.5                     |
| <b>Degree of metal pollution</b>      | <i>Extremely High</i>         | <i>Significant</i> | <i>Moderate-Significant</i> | <i>Moderate-Significant</i> | <i>Moderate-Significant</i> | <i>Moderate-Significant</i> | <i>Depletion to minimal-Moderate</i> | <i>Very high-Extremely high</i>   | <i>Moderate-Significant</i> | <i>Moderate-Significant</i> | <i>Extremely High</i> | <i>Significant-very high-extremely high</i> | <i>Significant</i>           |
| <b>45-&lt;63 µm</b>                   | 109–215                       | 6–20               | 3.7–5.9                     | 2.8–4.7                     | 3.6–6.3                     | 4.2–13.7                    | 1–2                                  | 30.8–57.2                         | 2.9–6.7                     | 2.6–5.4                     | 249–538.8             | 6.9–54.3                                    | 5–15.2                       |
| <b>Degree of metal pollution</b>      | <i>Extremely High</i>         | <i>Significant</i> | <i>Moderate-Significant</i> | <i>Moderate</i>             | <i>Moderate-Significant</i> | <i>Moderate-Significant</i> | <i>Depletion to minimal-Moderate</i> | <i>Very high-Extremely high</i>   | <i>Moderate-Significant</i> | <i>Moderate-Significant</i> | <i>Extremely High</i> | <i>Significant-Extremely high</i>           | <i>Significant</i>           |
| <b>63-&lt;106 µm</b>                  | 208–469                       | 4–21               | 4.2–9.3                     | 4.2–7.9                     | 4.5–9.1                     | 6.2–21.6                    | 1–4.2                                | 15.8–78.8                         | 4.1–9.6                     | 3.6–9.8                     | 493.7–1528.3          | 3.2–22.5                                    | 4.8–20.3                     |
| <b>Degree of metal pollution</b>      | <i>Extremely High</i>         | <i>Significant</i> | <i>Moderate-Significant</i> | <i>Moderate-Significant</i> | <i>Moderate-Significant</i> | <i>Significant</i>          | <i>Depletion to minimal-Moderate</i> | <i>Significant-extremely high</i> | <i>Moderate-Significant</i> | <i>Moderate-Significant</i> | <i>Extremely High</i> | <i>Moderate-significant-very high</i>       | <i>Significant-very high</i> |

*Degree of metal pollution: Extremely High*

**Table S6.** Range of Ecological Risk Values (Ei) of individual metals in different size groups in road dust of various sites in Kolkata.

| <b>Metal</b> | <b>&lt;28 µm</b> | <b>Ecological Risk</b> | <b>&gt;28–&lt;45 µm</b> | <b>Ecological Risk</b> | <b>45&gt;–&lt;63 µm</b> | <b>Ecological Risk</b> | <b>&gt;63–&lt;106 µm</b> | <b>Ecological Risk</b> |
|--------------|------------------|------------------------|-------------------------|------------------------|-------------------------|------------------------|--------------------------|------------------------|
| Cu           | 5.04–16.99       | Low                    | 3.34–22.48              | Low                    | 1.2–18.11               | Low                    | 0.26–11.37               | Low                    |
| Pb           | 1.23–1.99        | Low                    | 0.94–2.46               | Low                    | 0.79–1.94               | Low                    | 0.39–1.46                | Low                    |
| Cr           | 1.31–2.31        | Low                    | 0.89–2.88               | Low                    | 0.65–2.45               | Low                    | 0.16–1.3                 | Low                    |
| Ni           | 2.56–3.85        | Low                    | 1.31–4.25               | Low                    | 1.31–4.25               | Low                    | 0.88–3.16                | Low                    |
| Cd           | 323.27–552.32    | Very high risk         | 273.76–760.17           | Very high risk         | 227.45–530.66           | Very high risk         | 124.84–440.17            | Very high risk         |
| Zn           | 3.5–5.66         | Low                    | 2.46–6.12               | Low                    | 1.37–4.71               | Low                    | 0.32–3.30                | Low                    |

Ei<40: Low ecological risk, 40≤Ei<80: Moderate ecological risk; 80≤Ei<160: Considerable ecological risk; 160≤Ei<320: High ecological risk; Ei>320: Very high risk

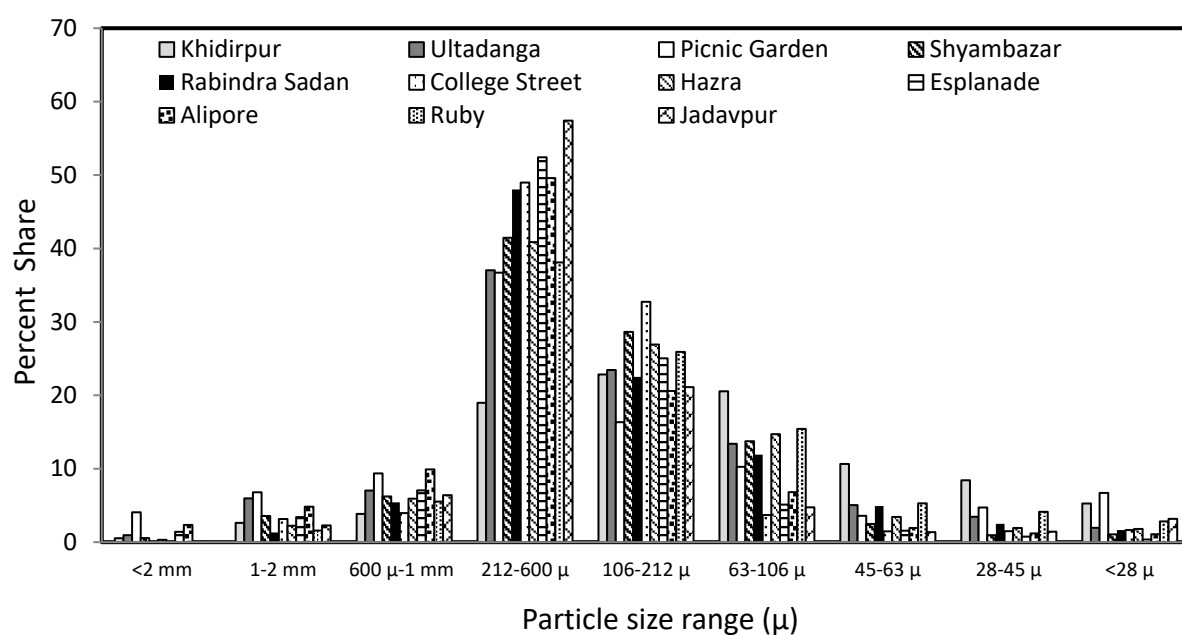

**Figure S1.** Particle size distribution of road-dust samples (<28–>2000  $\mu$ m size range) collected from different sites in Kolkata.

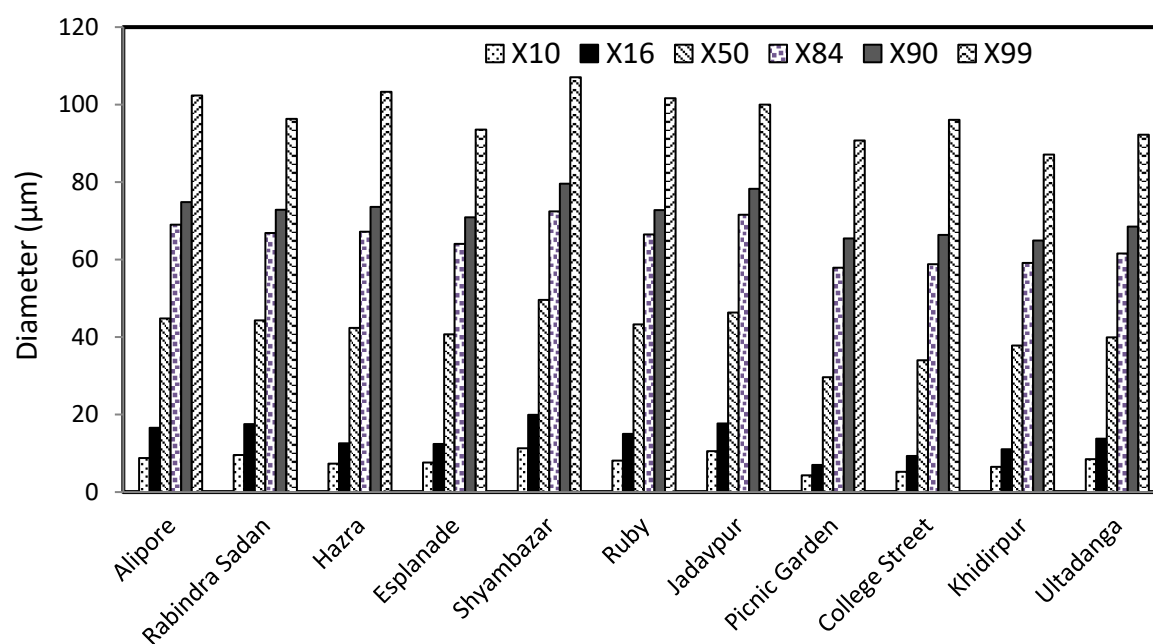

**Figure S2.** Percentile of particle size distribution of road-dust (<106  $\mu$ m) collected from different sites in Kolkata



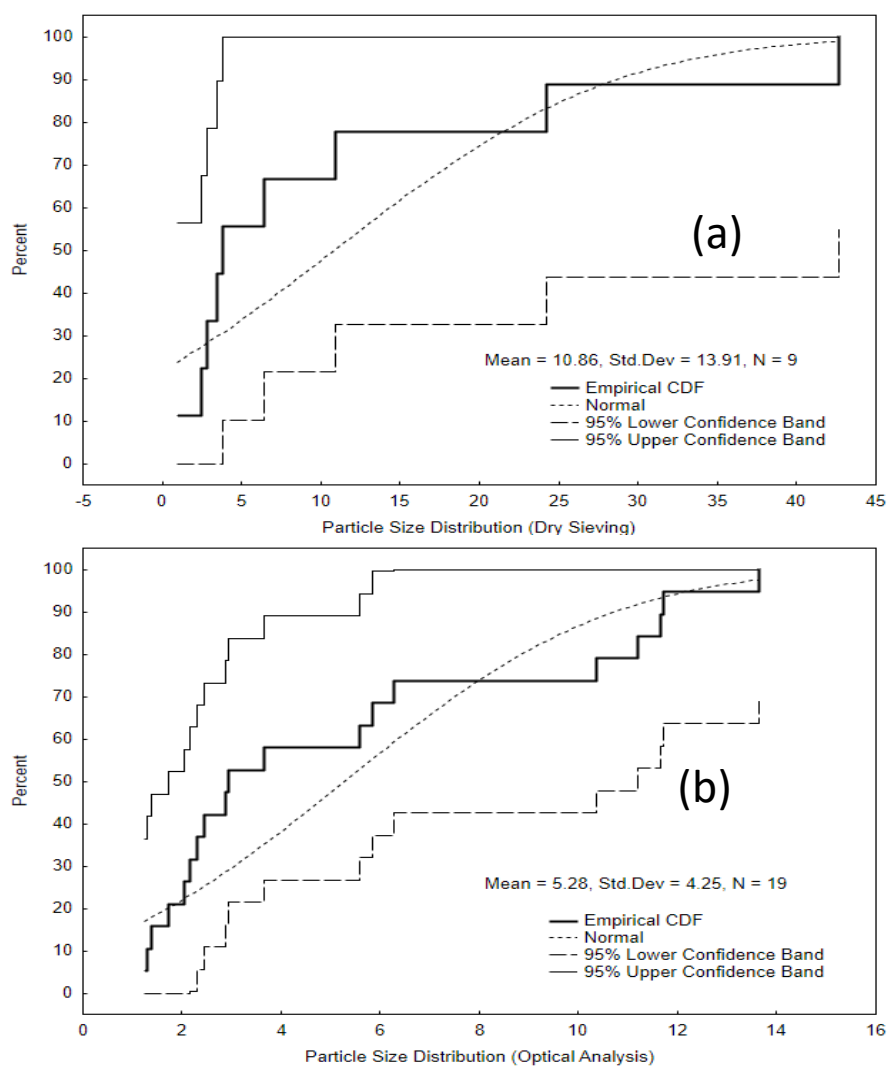

**Figure S3.** Plot of empirical cumulative distribution function (CDF) of average particle size distribution of (a) road dust (<28-2000  $\mu\text{m}$ ) (b) road dust (<106  $\mu\text{m}$  size range) against a normal distribution plot
